# Supplementary material
Source: PubMed Central journal article supplement (PMC7196824)
Supplement: pnas.1915378117.sapp.pdf [file pnas.1915378117.sapp.pdf]

# Supplementary Information for

## The Diversity-Innovation Paradox in Science

Bas Hofstra<sup>1\*</sup>, Vivek V. Kulkarni<sup>2</sup>, Sebastian Munoz-Najar Galvez<sup>1</sup>, Bryan He<sup>2</sup>, Dan Jurafsky<sup>2</sup>, & Daniel A. McFarland<sup>1\*</sup>

<sup>1</sup> *Stanford University, Graduate School of Education,  
520 Galvez Mall, Stanford, CA 94305, USA*

<sup>2</sup> *Stanford University, Department of Computer Science,  
353 Serra Mall, Stanford, CA 94305 USA*

\* To whom correspondence should be addressed: bhofstra@stanford.edu or mcfarland@stanford.edu

### This PDF file includes:

#### **Supplementary Text**

*Diversity and Innovation*  
*Measuring Innovation Through Citations, Keywords, and Text*  
*Structural Topic Models for Concept Extraction*  
*The PMI Score to Identify Meaningful Links*  
*Student Gender and Race*  
*Academic Discipline*  
*Population Coverage and Data Weights*  
*Inferential Models*  
*Linking ProQuest to Web of Science*

#### **Figures S1 to S4**

#### **Tables S1 to S4**

#### **SI References**

## **Supplementary Text**

### ***Diversity and Innovation***

Historically underrepresented groups come from distinct walkways, and have different experiences and perspectives than majority group members in science. Given this “outsider” vantage, underrepresented groups may perceive things differently from the majority group members, drawing relations between ideas and concepts that may have been missed or ignored. As such, they may be more likely to create novel connections between ideas in comparison with individuals who share the background and experiences of the traditional group already in place. Therefore, the inclusion of underrepresented groups in science may increase the variety of perspectives brought to bear on scientific research. Such intuitions align with recent work (1-4). For instance, Page (1) (see also Bell et al. (2)) reviews a large and growing body of evidence revealing how greater gender and racial diversity on teams creates a more heterogeneous pool of thinkers, and that in the long run (after some conflict), these groups are more innovative and outperform more homogenous groups. In the case of underrepresented groups – such as women and minorities – they may bring a perspective and set of concerns that are missed by the majority groups present in science (who were the “default” from the outset), and therefore, they introduce heterogeneity to the collective thought process. This heterogeneity generates what he calls “diversity bonuses” to improved problem solving, increased innovation, and more accurate predictions.

### ***Measuring Innovation Through Citations, Keywords, and Text***

Prior researchers have studied citations or keywords to understand scientific innovation. For instance, some prior work (5) regarded novel recombination of bibliographic sources to be a sign

of innovation. Here, we extend prior work by using recombinations of concepts used in scientific text, thus likely maintaining references to the explicit meaning of said concept combinations (6).

Keywords are an alternative to citations. They constitute “plausible building blocks of content” (7), and get at taxonomic aspects of scientific knowledge. Prior work used keywords to identify where innovation arose from subfield integration (8). An issue with keywords, however, is that it is difficult to ascertain whether they classify the general topic of a paper or refer to specific contents and innovations contributed by it. Researchers, and often editorial teams, assign keywords to optimize indexing and retrieval (9). The use of keywords then begs the question of whether they locate innovation in a research article or in its classification.

As an alternative to keywords, prior work used chemical entities from annotated MEDLINE abstracts as their units for innovation (7). By extracting chemical entities from abstracts, this work overcome potential confounding with classification dynamics. Yet, the study of chemical entities is highly specific to one field: chemistry. As such, scholars acknowledge, “new methods should be developed for mining building blocks with finer granularity” (7: 901). Our analysis of novel recombinations of concepts in documents overcomes the issues of citations and keywords and thus elaborate and extend the research program on innovation.

There are at least two more advantages to measuring innovation and impact with the language of PhD recipients in dissertations vis-à-vis citation records of scholars in journals. First, language metrics are relatively unaffected by academic search engines, journal guidelines, or differences in indexing across corpora, or by the variety of reasons as to why scholars cite others’ work (6, 10). As such, we detect signals of innovation that may otherwise be hard to trace and which are insensitive to potential biases resulting from corpora that unjustifiably exclude citations in other academic fields. Second, our corpus captures a near-population of scholars’ early texts

and does not discriminate by prioritizing some academic fields at the expense of others. As such, the language and innovations of slower, book-oriented science (e.g., History), medium-paced, publication-oriented science (e.g., Sociology), or faster, proceedings-oriented science (e.g., Computer Science) are all represented and measured in our corpus.

Finally, a potential drawback of our universe (ProQuest dissertations) is that the link introductions we identify in ProQuest dissertations might have arrived earlier in other corpora (e.g., peer-reviewed journals, or even fiction). However, it provides (at the very least) unique insight into which dissertations are novel compared to others dissertations and, thus, which students are competitive vis-à-vis others with their earliest innovative sparks in the knowledge they produce.

### ***Structural Topic Models for Concept Extraction***

#### *Structural Topic Models*

To identify scientific novelty in concept use, we first fit Structural Topic Models (STMs) (11) where we model the prevalence of topics in dissertation abstracts (~1.2 million) as a linear function of the year in which scholars obtained their doctorate. Structural topic modelling is an unsupervised learning technique that represents texts within a corpus as a mixture of latent thematic dimensions without *a priori* knowledge of what these dimensions might be. STMs rely on co-occurring words within documents. In an iterative process, this kind of model draws samples from a corpus to derive a series of topics – i.e., weighted sets of co-occurring words in a text. The outcome of this process is twofold: (a) the model arrives at the set of topics best suited to explain the thematic dimensions of a corpus of texts; and (b) the model produces an optimal representation of every document as a mixture of topics.

More formally in a topic model, a given topic  $k$  is associated with a probability mass function  $\beta_k$  over a given vocabulary  $V$  (12). In every document  $d$ , the model draws a topic for each word position  $n$  from a multinomial based on a global prior distribution over topics,  $\theta_d$ . Then, the model draws the observed word  $w$  for position  $n$  from a multinomial based on  $\beta_k$ . The distribution  $\beta_k$  associated with topic  $k$  controls the probability of drawing the  $v$ -th word in the vocabulary for topic  $k$  (12). The model learns the  $\theta$  and  $\beta$  distributions via variational expectation-maximization (see 13, 14). For the purpose of this study, we can think of the distributions  $\beta_k$  as distinguishing important words in the vocabulary with respect to topic  $k$ . STMs are a particular kind of topic model that allows us to include additional information into the model (12); namely, we estimate  $\theta$  as a function of the year of publication of the dissertations. Specifically, we allow topics to be more or less prevalent over time. We do this by modelling the prevalence of topics in dissertation abstracts as a linear function of the year in which scholars obtained their doctorate. We found that including publication metadata in  $\theta$  had little impact on the  $\beta$  distributions we use to extract documents. Trying to model  $\beta$  distributions directly as a function of year of publication was computationally intractable. Further, we discovered that STMs and simpler LDA topic models produced very similar  $\beta$  distributions. We opted to keep the STMs as they introduce more information without a loss in the quality of the topics or their interpretability.

In our corpus, topics refer to areas of scientific research and discourse. We extract terms that STMs identify as the most distinct and heavily used *within each research area*. We contend that scientific innovation involves novel combinations of such terms. The affordance of STMs in comparison to simpler concept extraction strategies –i.e., choose the top  $n$  TF-IDF weighted terms– is that it allows us to extract terms that play a significant role in an underlying thematic structure.

We mention “best-suited” topics and “optimal” document representations because STMs, like other mixture models of its kind, allow for the validation of different numbers of possible latent dimensions or themes. Here, we fit STMs within a range of a set number of topics [ $K = 50-1000$ ], with incremental steps of 50 (and steps of 100 when  $K > 600$  to save computing time). Internal and external validation indices show that the optimum of the number of topics is at approximately  $K = 400-600$  topics. In the main text of the study, we have presented results for  $K = 500$ . This means that we used the weights on the vocabulary from an STM with 500 topics to extract the concepts that best describe the latent dimension in the corpus. Namely, the extracted concepts belonging to the highest FREX-score terms of each topic (detailed below). However, our results remain robust under alternative specifications for concept extraction (leaning towards either frequency, exclusivity, or balancing both equally) and for a range of  $K$  (for 400, 500, and 600) (see Table S1). Next, we first detail how we preprocess the data and arrive at  $K = [400-600]$  based on several fit metrics, and then outline the concept extraction using FREX.

### *Preprocessing Texts and Fitting STMs*

We preprocess the data by the following steps. We remove stand-alone numbers, punctuation, English stop words, and special characters from the text. However, we keep numbers belonging to terms such as molecules (e.g., H<sub>2</sub>S), which might refer to substantive concepts. We then stem the words using the Snowball algorithm and remove those tokens that only appear once across all documents. We extract n-grams for sequences of words that occur more frequently than by chance using El-Kishky et al.’s method (15). We then fit STMs at  $K$  [ $K = 50-1000$ ] in incremental steps of 50 (and steps of 100 when  $K > 600$  to reduce computing time) by training each for 20 epochs.

### *Internal validation*

We then *internally* validate the models to find out what number of topics retrieves the most-discriminant latent thematic dimensions; which is equivalent to finding the dimensionality reduction solution that retains the most information about the corpus. To do so, we consider both the *coherence* and *exclusivity* (11, 16) of the topics produced by models at different values of K.

The coherence of a topic assesses its internal consistency. Semantic coherence is obtained by calculating the frequency with which high-probability words within a given topic co-occur in documents. The most-probable words in a highly-coherent topic tend to appear together in documents. Conversely, a low-coherence topic comprises high-probability words that appear in isolation from each other. It would be difficult to argue that a low-coherence topic is of much use in representing documents, since it can appear in multiple documents with very different terms.

Assessing topics solely on their semantic coherence is not enough, since this measurement can be trivially maximized by reducing the number of topics. For instance, if we had a single topic, high-probability terms would co-occur by construction. Similarly, a topic that comprises very common words of a topic (e.g., data, study, etc.) will appear to be very coherent since these terms co-occur in most documents by convention. Therefore, as a complement to semantic coherence, we want our model to produce topics that have very distinct high-probability terms; that is to say, we want topics with high exclusivity. Exclusivity measures the extent to which words within a topic are distinct from the words in other topics. There is a trade-off between a topic's exclusivity and semantic coherence – i.e., overall high-probability words tend to drive very coherent topics, since they are likely to co-occur; but these words also tend to co-occur with the terms from many topics, and so they drive low exclusivity topics. Given this trade-off, we explore the solution space along values of K looking for the model where both exclusivity and coherence plateau and do not

improve nor decrease with a lower or higher number of topics, thus providing us with a potential limit for  $K$ . Figures S1-A and S1-B shows that this limit is likely to be in the range of  $K = 400-600$ .

### *External validation*

In addition to internal validation, we also employ external validation. To this end, we compare the distance between documents based on an STM with a given  $K$  with the document distances based on author-provided keywords and fields. We use the academic fields and keywords that students file with their dissertations. We draw a random sample of 1000 documents that remains constant across values of  $K$ , and compute the cosine similarity between document pairs in this sample based on the documents' topic mixtures. In so doing, we leverage that all document pairs are comparable in vector  $\theta$ , which represents any given document as a probability distribution over all topics. We then consider any given document pair to be related if their cosine similarity is greater than the median similarity in the sample. For the field and keyword relations between documents, we consider whether bigrams (fields + keywords) occurring *within* a document co-occur *between* two documents; when this is the case, we render these documents related.

We represent the relations described above as two document-to-document networks, one STM-based and one bigram-based network, and study their overlap. We are interested in four kinds of comparisons at the level of document dyads, which we can picture as a two-by-two matrix where the rows indicate if a document dyad appears in the STM-based network (Yes/No) and the columns indicate if the dyad appears in the bigram-based network (Yes/No). Given the comparisons of interest, we compute the Matthew correlation coefficient, which measures the overlap at the dyad level between the STM and bigram networks. An advantage of the Matthew correlation metric is



that it accounts for overlap on true negatives (i.e., when a document dyad does not appear in either the STM or the bigram network). The Matthew correlation coefficient is defined as follows:  $Matthew\ correlation = TP \times TN - FP \times FN / \sqrt{(TP+FP)(TP+FN)(TN+FP)(TN+FN)}$ , where T and F define true and false, and P and N define positives and negatives. Figure S1-C depicts the result of the correlations between keyword and STM relations. We find that the curve follows a similar trend compared to the internal validity metrics. There is a decrease as K moves beyond 500, providing some external validation with user-labeled information that the number of topics seems to optimize around  $K = 500$ .

### *Consistency*

Additionally, we study the consistency of topic assignments across the range of K [50-1000] – i.e., whether the topics retrieved at one value of K are informative of the topics obtained at another value. To this end, we first classify all documents by their highest-proportion topic at each value of K. This step results in a set of classification schemes, one scheme for each model with a different value of K. We then compare the classification schemes of consecutive models (i.e. the document classification under  $K = 50$  compared to the classification under  $K = 100$ ) using the Fowlkes-Mallows index (FM). The Fowlkes-Mallows (FM) index measures overlap between two distinct clusterings of the same data set. FM is part of a family of indices for external clustering validation, such as the Jaccard coefficient and the Rand statistic, that use the agreements and/or disagreements of the pairs of data objects in different partitions (17). This measure is the geometric mean between precision and recall and is bounded between 0 and 1; higher values indicate greater agreement between two partitions – i.e., implying higher similarity in how the two partitions are clustered. There are external clustering validation metrics for multi-labeled corpora, like the document-topic

matrices produced by STMs (18), but we use the FM index for simplicity, as we want to describe the alignment of multiple STMs at different values of  $K$ . It shows us at which  $K$  the overlap plateaus to pinpoint our number of topics.

In Figure 4-D we describe the *rate* at which the overlap between classification schemes vary when comparing each model with  $K$  topics to the immediate prior model with smaller  $K$ . We see relatively high values of consistency with a gradually growing curve, which suggests that classification schemes are more similar at the higher end of values of  $K$ . The range of  $K$  suggested by FM is in line with the previous measures: we see a steady rise and somewhere between  $K = 400$  and  $K = 600$  it stabilizes and only a gradually improvement afterwards. Raw FM scores suggest that more than two-thirds of document-to-topic assignments are stable from  $K = 400$ .

### *The “Right” $K$*

Finally, we emphasize that we do not use the “right”  $K$ , as that would imply that we are perfectly aware of the topic (and, hence, scientific) universe. We use  $K = 500$  in the main text as the metrics all seem to plateau around that value. However, if we choose  $K = 400$  or  $K = 600$  and measure concept/link introduction and uptake in a similar way (using low, medium, and high FREX-weight), our results do not qualitatively change. The “right”  $K$  – if one is to interpret that as the set number of scientific topics at the specialization within disciplines level – likely is somewhere between 400-600. A benefit of our approach, and what our associated results show, is that the key results stay mostly qualitatively similar whichever  $K$  (400, 500, or 600) we choose.

### *Concept Extraction With FREX*

Using the STM output, we then obtain the most-frequent and most-exclusive terms within a given topic. The most-frequent terms reflect general language present in many of the topics (e.g., “data,” “analyze,” “study,” etc.), whereas the most-exclusive terms may be too idiosyncratic to be informative in and of themselves (e.g., “eucritta melanolimnete,” “periplanone b,” etc.). Concepts that are both common and distinctive balance generality and exclusivity. To get at this, we extract concepts on the basis of their FREX score (19), which compounds the weighted frequency and exclusivity of a term in a topic. Here, we explore three weighting schemes: equally balancing frequency and exclusivity (50/50), attaching more weight to frequency and less to exclusivity (75/25), and attaching more weight to exclusivity and less to frequency (25/75). We then extract the top-500 FREX-words per topic –  $K = [400-600]$  with incremental steps of 100 – and measure our innovation variables for all three  $K$ 's and three FREX weighting schemes (i.e., nine scenarios in total). The more-frequent semantic space defines the more-standard scientific vocabulary, and the more-exclusive semantic space is more idiosyncratic indicative of non-standard concept usage. Sensitivity analyses provide robust results across the scenarios for novelty, impactful novelty, and recognition (see Table S1). For the results depicted in the main text, we report the scenario where frequency and exclusivity are equally balanced at  $K = 500$ .

### *On Analyzing Abstracts Versus Full Texts*

We analyze dissertation abstracts based on the conjecture that abstracts are a good approximation of the knowledge and concepts that populate full texts. Prior work consistently shows that this conjecture is a reasonable one, as abstracts provide a clean, uncluttered synthesis of the full text. Prior work suggests that the goal of abstracts is to summarize and emphasize a paper's key

contributions (20). Empirical work observes that abstracts provide sufficient syntheses of concepts, tables, graphs, and topics in papers (21-24). Pragmatic arguments in favor of using abstracts is that the use of full text is highly restricted by its general inaccessibility, biased sampling, poor scalability, and high demand on computational resources for large corpora. In contrast, abstracts are easier to obtain and typically demand far fewer computational resources. Additionally, with the use of full text come some theoretical difficulties. For instance, if we study concept co-occurrence in full text, at what distance do concepts need to co-occur in order to render the co-occurrence substantively meaningful? In the same text, section, paragraph, or sentence? Co-occurrences in abstracts are far more likely to be substantively meaningful as abstracts only cover ~10 sentences. Finally, our main results would only qualitatively change if numerical minorities write abstracts that are inherently different compared to those written by majorities. Given the general goal of abstracts – i.e., summarizing main contributions and findings (20) – we assume that the retention of innovations in abstracts versus full text is not higher (or lower) for numerical minorities vis-à-vis majorities.

### ***The PMI Score to Identify Meaningful Links***

The significance score (25) for links is defined as follows, given a concept link  $L = (a, b)$  we compute such a score as:

$$PMI(L) = \log_{10} \left( \frac{\Pr(a, b)}{\Pr(a) \times \Pr(b)} \right), \quad (1)$$

where  $\Pr(a, b)$  is the likelihood that concept link a–b occurs,  $\Pr(a)$  is the likelihood of concept a and  $\Pr(b)$  is the likelihood of concept b. “Good” links will then result in a high PMI scores – significantly more likely to occur than chance. We then filter for spurious recombinations using a rank-based cutoff based on the *PMI* score. To ensure sufficient power for computing *PMI*, we only

consider those links where individual terms occur in at least 10 theses. We consider the top 10 million links, so as to have ample opportunity to introduce “novelty” while simultaneously removing obviously meaningless links. This is achieved by setting a cut-off on the *PMI* score for link introductions.

### ***Student Gender and Race***

The ProQuest dissertation corpus (26) does not contain records of gender and race of students that filed their theses. Therefore, we predict the race and gender of students based on their first (gender) and last (race) names (27). For race, we compiled US Census data of 2000 and 2010 (28). These censuses show relative frequencies of racial backgrounds of last names that occur more than 100 times ( $N = 167,409$  distinct last names that cover  $> 95\%$  of the US population). For instance, it shows the fraction of individuals who carry the last name “Jones” whom are white. The correlation in racial background percentages of overlapping names ( $N = 146,516$ ) in both censuses is .99. For gender, we compiled data of the US Social Security Administration (29). This corpus shows the fraction of girls and boys among the top 1000 first names from people born from 1900 to 2016 ( $N = 96,122$  distinct first names that occur at least five times) – e.g., the fraction of girls named “Jane.”

We matched distinct last names of the censuses to the last names (up to the first space or hyphen) in data from Private University where we are aware of self-reported race ( $N_{\text{total}} = 24,150$ ;  $N_{\text{match}} = 20,264$  [83.9%]). We matched all distinct first names of the social security data to the first names in the Private University data where we are aware of self-reported gender ( $N_{\text{total}} = 35,469$ ;  $N_{\text{match}} = 31,026$  [87.5%]).

An algorithm automatically traced which thresholds of the fraction of the last- and first-name carriers’ race and gender yield the highest possible correlations between real and assigned

gender or race. It did so by correlating self-reported gender and race with all permutations of the thresholds in steps of 1 percent. A threshold where at least 71.45% of the first-name carriers are female to assign students to a female gender provided the highest correlation between self-reported and assigned gender ( $r = .91$ ). In order to identify the gender signal of those names that are not classified according to this prior classification scheme, we employ the Genderize.io classification scheme (e.g., see 30-32) (agreement between our and the Genderize.io classification is  $> 95\%$ ). We arrive at  $\sim 8.5\%$  of cases with unknown genders.

Additionally, the highest correlations for race were .83 (white, 12,929 of 13,197 identified correctly [97.2%]), .93 (Asian, 5,079 of 5,436 identified correctly [93.4%]), .73 (Hispanic, 698 of 992 identified correctly [70.4%]), and .25 (African and Native American, 63 of 639 identified correctly [9.9%]). Using these thresholds, we classify students into a racial background and gender. If students are classified into multiple races given our thresholds, we use a decision rule; (1) when a student was classified into the African and Native American or any other category, we classify them as African and Native American; (2) when a student was classified into the “Hispanic” and “white” or “Asian” category, we classify the student as “Hispanic”; (3) when students were classified into the “Asian” and “white” category, we classified the student as “Asian” category. Finally, if the thresholds did not classify a student into a category, we used a majority rule to categorize the student into a race. For instance, when “Yao” does not meet a threshold while most individuals named “Yao” are in fact Asian we classify these as “Asian.”

The fraction of correctly identified in the “African and Native American” category is low. We found that these students are predominantly labelled under “white” (528 white out of 639 Other Race). We therefore incorporate a second method that utilizes the sequence of characters for classification of race using names (33). Specifically, we utilize their method using full names in

the Florida voting registration data (34). The precision of this method is especially high for Hispanic and African American names – .83 and .74, respectively – so patching our classifications with theirs combines the strength of our “white” and “Asian” and their “Hispanic” and “African American” classifications. If the probability of a certain name being Hispanic or non-Hispanic Black is higher than .6 using their method, we label those cases as such. We ascertain that those cases are highly likely to belong to those categories. Additionally, if our classification yielded an “unknown” case, if the probability that a name is Hispanic or non-Hispanic Black is higher than .3, *and* that probability is twice as high as the probability that a name is “White,” we label those cases as Hispanic or African American. This filters the classification for very low probabilities, while simultaneously being confident that those names significantly differ and do not have a clear signal for whites. Finally, if cases are still unknown, and the probability of a name being Asian or White is higher than .5, we label those cases as such. Our number of cases with unknown race is ~10.8%. Nonetheless, to ensure that remaining errors in our classification of race by name do not affect our results, we run a sub-analysis using only the highly certain cases for inferring race. The results using this smaller but higher-precision dataset are qualitatively similar to the ones presented in the paper.

### ***Academic Discipline***

Some theses do not identify the department from which they got their degree. To infer this, we first extracted theses *with* department degrees in ProQuest dissertations. Each department was then semi-manually canonicalized to a National Research Council (NRC) department. Given that there are many spelling mistakes, a fuzzy string matching was used to match the ProQuest department with the actual listed NRC departments based on a 90% string similarity (a manual analysis showed

100% accuracy). For the frequent department names that matched around and 70-89% to an NRC department, each canonicalization from ProQuest to NRC were manually verified (while rejecting those that were invalid). All dissertations whose department name could not be mapped to an NRC department had their department inferred as if it had not been listed. We used the successfully matched dissertations with an NRC department ( $N = 178,511$ ) as a ground truth. Next, we trained a Random Forest Classifier (RFC) based on a list of features from the dissertation; binary features for whether the dissertation was listed with an NRC subject category, binary features for whether the dissertation was listed with ProQuest subject category, all keywords used for the dissertation, the topic distribution of the dissertation abstract using a 100-topic Latent Dirichlet Allocation model, the average Word2Vec word vector for each of the (1) keywords, (2) ProQuest fields, (3) NRC fields, and (4) title, and the degree-granting university. The RFC infers department degree with 96% precision ( $N_{\text{DISCIPLINE}} = 84$ ).

### ***Population Coverage and Data Weights***

During the study period (1977-2015) approximately 1.2 million doctorates were awarded in total. This suggests that the ProQuest data cover approximately 86% of the total number of US doctorates over three decades. If we plot the ProQuest database and the population of awarded doctorates in the US over time, the trends are highly similar. In our inferential analyses, we weigh the data from 1982 to 2010 by the total number of doctorates awarded by an institution in a given year to account for possible selectivity between universities in years in filing their doctorates' theses in the ProQuest database. To do this we calculate for each distinct year-university combination (e.g., at Harvard University in 1987) the number of PhD recipients and divide this number by the total number of PhD recipients in the ProQuest data, 1982-2010. This yields the



relative number of PhD recipients in the ProQuest data per year for each university. We repeat this calculation for the *total* PhD recipients according to the data from the National Science Foundation. We then divide the relative number of PhD recipients for the university-year combinations in the ProQuest data by the relative number of PhD recipients for the university-year combinations in the census to obtain our data weights. We use these weights as survey weights in our inferential analyses. We use Stata 13 for the inferential analyses in the paper and to compute average marginal effects shown in Figure 2-4.

### ***Inferential Models***

Analytically, our models take the following forms:

$$Pr(Y = y_j | \mu_j, \alpha) = \frac{\Gamma(y_j + \alpha^{-1})}{\Gamma(\alpha^{-1})\Gamma(y_j + 1)} \left( \frac{1}{1 + \alpha\mu_j} \right)^{\alpha^{-1}} \left( \frac{\alpha\mu_j}{1 + \alpha\mu_j} \right)^{y_j}, \quad (2.1)$$

where

$$\mu_j = \exp(\beta_0 + \beta_1 X_j + \dots + \beta_k X_j), \quad (2.2)$$

$$Y = \beta_0 + \beta_1 X_j + \dots + \beta_k X_j + \varepsilon, \quad (3)$$

$$Pr(Y \neq 0 | X_j) = \frac{\exp(\beta_0 + \beta_1 X_j + \dots + \beta_k X_j)}{1 + \exp(\beta_0 + \beta_1 X_j + \dots + \beta_k X_j)}. \quad (4)$$

Equation (2) models the expected count/rate of link introductions (novelty) or uptake per new link (impactful novelty), equation (3) models the average distality of the introduced links by students, and equation (4) models career success as becoming a faculty researcher or sustaining a research career. All equations (2)-(4) are for individual student  $j$ . In these models,  $\beta_0$  represent intercepts and  $\beta_1 X_j + \dots + \beta_k X_j$  represent our vector of covariates from the first to the  $k^{th}$  variable that predicts the outcome  $Y$ . Variables included in this vector are our main predictors (e.g., indicators for gender and race representation) and the confounding factors (institution, discipline, and year).

Uptake per new link (impactful novelty) is a non-integer rate instead of an integer event count. An occasional method of modelling non-integers is to offset the negative binomial regression with logged independent variables. Here, we do so for the number of new links when we model uptake per new link so as to interpret coefficients of other independent variables as rate increases or decreases (35, 36). A (simplified) example is an expected count  $\mu_x$ , where  $\mu_x$  is dependent on some covariate  $X$ , so that  $\log(\mu_x) = \beta_0 + \beta_1 X$ . If  $t_x$  would then indicate exposure (or offset), then  $\log(\mu_x / t_x) = \beta_0 + \beta_1 X$  models an expected rate (count divided by exposure) and this is analytically equal to  $\log(\mu_x) = \beta_0 + \beta_1 X + \log(t_x)$ . Hence, we include a logged offset variable  $t_x$  in the form of logged number of new links. As such, we are able to model uptakes per new link as non-integer rates.

### ***Linking ProQuest to Web of Science***

We attempt to link each student in the ProQuest corpus to their corresponding identity in two sets of publication corpora from the Web of Science (WoS) obtained from Clarivate Analytics. The first set contains publications from 1900 to 2009 (~22 million) and the second set contains publications from 2009 to 2017 (~16 million). The matching process between ProQuest dissertations and both WoS corpora relies on substantial meta-data in each of the three data sources.

The pre-2009 WoS data does not contain canonical author identifiers with high precision so we use a disambiguated author cluster (37), which contains groups of publication records in WoS estimated to be authored by the same person with substantial certainty (83%). The post-2009 does contain disambiguated authors by Clarivate Analytics with substantial accuracy post-2009, but with poor accuracy pre-2009. In order to make optimal use of both disambiguated datasets, we needed to reconcile the pre-2009 clusters and the post-2009 clusters. Hence, the goal is to link

these two author-disambiguated datasets so as to benefit from the high accuracy from both datasets across the whole time range and increase coverage throughout. We pinpointed which author-clusters in the pre-2009 set were which clusters in the post-2009 set. We generated a link between the pre-2009 and the post-2009 author clusters, indicating that both clusters are the same author, if any of the following conditions were met, in addition to sharing a full name: 1–75% of the pre-2009 cluster articles are a subset of the post-2009 cluster articles; 2–There is at least one matching email address between an old cluster and a new cluster. Once these rules were applied, we finished cluster linking by manually checking and verifying a random sample of entries, in addition to automated verification of linking rules being followed on a larger random sample. The method above is conservative in its creation of links as a result of the strictness requiring a 75% match in order to link. This approach prioritizes the reduction of mistakenly-linked clusters at the expense of undiscovered linkages. Precision of the line-up between the two sets is 97%, which we inferred from a set of online, self-labeled publications by scholars that Clarivate Analytics provided (ResearcherID).

In turn, matching between WoS (linked pre- and post-2009) and ProQuest dissertations follows a multi-step sieve process, where scholar matches are evaluated using multiple successive criteria starting with the highest-confidence first: (1) number of article co-authorships with a known advisor or advisee, (2) number of articles where the WoS author is at one of the same institutions from the ProQuest data (as an advisor or advisee), (3) number of article keywords matching those from their dissertation keywords, (4) minimum string similarity of the authors' names (as reported for each article) with the name in ProQuest, and (5) textual similarity of the articles' abstracts and titles with the dissertation abstract. For naming similarity, our method is robust to minor typographic errors in names (as ProQuest information is manually entered) and to

recognized naming variants (e.g., Dave or David) and abbreviations in the first and middle names of the individuals. This entire matching process amounts to a maximum bipartite matching of the ProQuest and WoS authors, ensuring that one author from either side is never linked to more than one author on the other side.

As this matching process could potentially be noisy, we take additional steps to heuristically reduce the potential for mismatches. First, we restrict WoS matches to only those individuals whose publication history is similar to their graduation date; this restriction excludes matching those individuals whose nearest publication date is 15 years after or 10 years before graduation. Second, we avoid matching individuals where the bulk of their publication occurs before their graduation, except in the case where there is additional evidence to support the matching from co-authorship with their advisor. Third, we avoid matching individuals whose only evidence for being the same person is their name similarity and a textual similarity between their dissertation and the articles (e.g., no evidence of being at the same institution where they would have graduated or advised students).

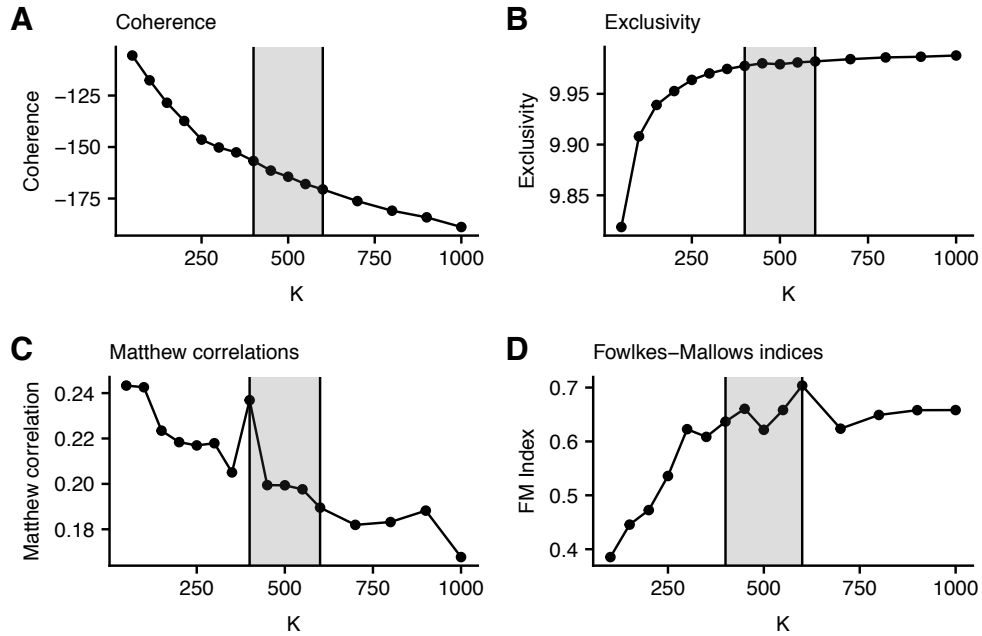

**Figure S1.** Internal and external validity and coherence for structural topic models. (A-D) We highlight the range of  $K$  we use ( $K = 400-600$ ). (A-B) Values of coherence and exclusivity across a range of  $K$ . With a rising number of topics exclusivity increases but plateaus at approximately  $K = 400$ , while coherence decreases somewhat continuously, although less steep from  $K = 250$ . (C) Matthew correlations between external relations between documents and keywords and relations between documents derived from the topic models. The correlations spike at  $K = 400$  and stabilize thereafter. Robustness analyses for  $K = 450$  yield the same results as the analyses for  $K = 400$ . (D) Fowlkes-Mallows indices indicating overlap of topic-assignments for consecutive  $K$ 's. The Fowlkes-Mallows correlation plateaus from approximately  $K = 300$  and onwards, with a spike at about  $K = 600$ .

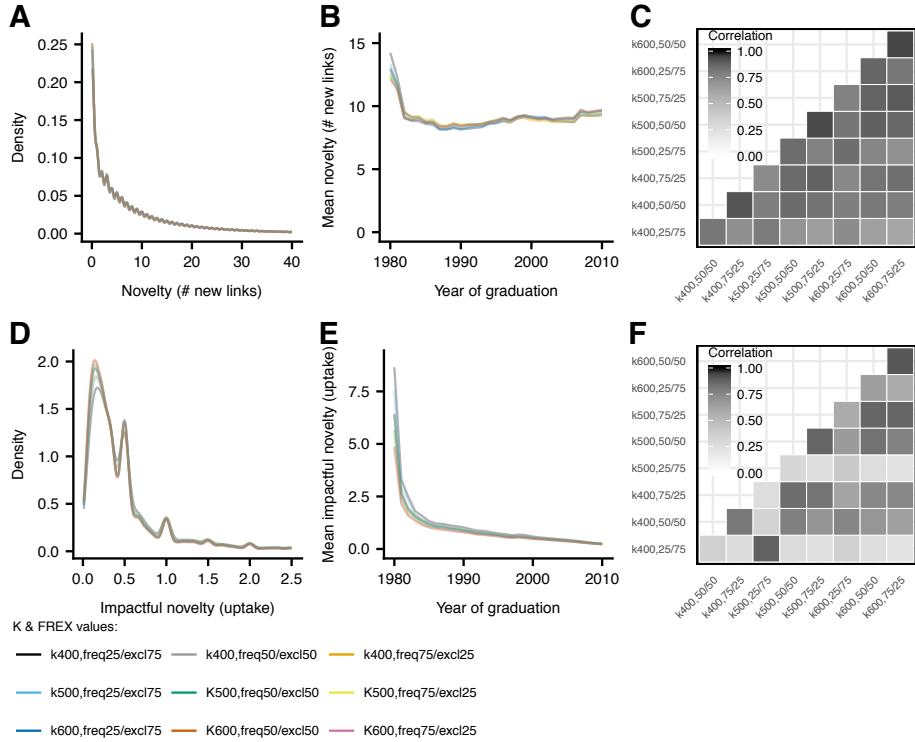

**Figure S2.** Distribution of novelty and impactful novelty.

(A) Density distributions of novelty (# new links) for a different number of  $K$  and difference scenarios for FREX (low, medium, or high frequency). Despite absolute differences, the distributions are qualitatively similar. (B) Mean novelty over time. The figure suggests that the “stable” novelty starts at approximately 1982. The main paper analyzes the data from that point onward. (C) High correlations between the different novelty scenarios. (D) Density distributions for impactful novelty (uptake per new link), again suggesting similar distributions across the  $K$  and FREX scenarios. (E) Mean impactful novelty over time, suggesting that the “stable” impactful novelty starts at approximately 1982. (F) Relatively high correlations between the different scenarios for the measure of impactful novelty.

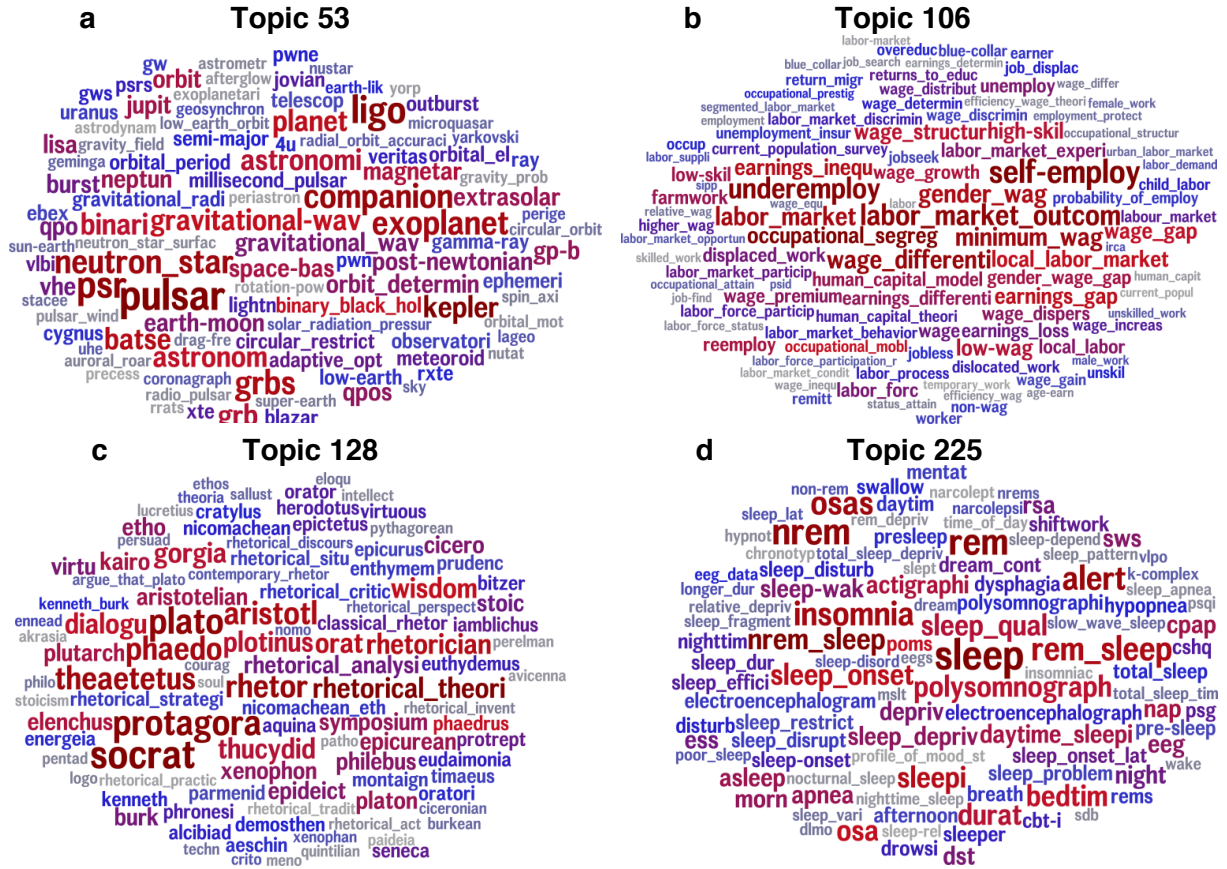

**Figure S3.** Exemplary topics and their extracted concepts using FREX. (A-D) Concepts from a small selection of extracted topics in our  $K = 500$  topic model where we equally balance frequency and exclusivity. Topics are research areas and discourse themes characterized by set of co-used terms, some of which are more salient to the latent themes than others. (A) Students engaging in this topic are writing about astrophysics. (B) Students engaging in Topic 106 are writing about labor economics and income. (C) Students engaging in Topic 128 focus on rhetoric and classic Greek philosophers (with some exceptions). (D) Students engaging in Topic 225 are writing about sleep patterns and issues surrounding it. This is a small selection here, but the full set of topics is available online ([https://github.com/bhofstra/diversity\\_innovation\\_paradox](https://github.com/bhofstra/diversity_innovation_paradox)).

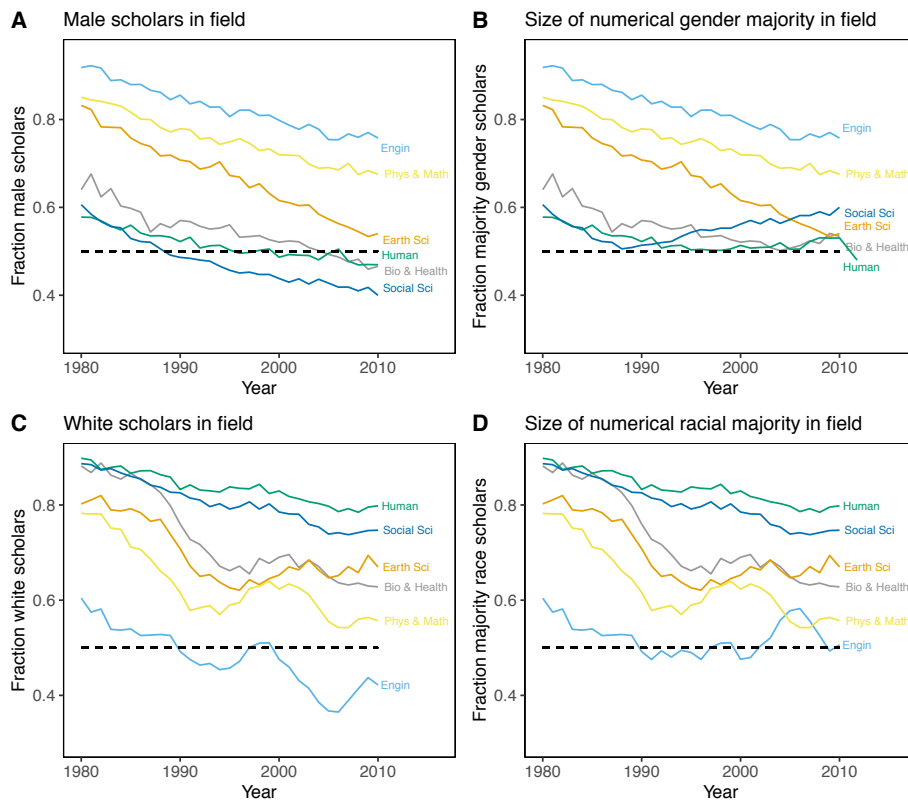

**Figure S4.** Gender and racial representation of students in academic fields over time (A-D) We aggregate the disciplines into broader academic fields for a depiction of minority statuses. Across all fields, women and non-white students are numerical minorities and keep that status very frequently. (A) Women become numerical majorities (and men minorities) when the fraction of male students drops below .5 (e.g., Social Sciences > 1990). (B) Depicting the size of the numerical gender majority. Women become majorities in case where the fraction of men drops below .5 in panel A, which happens only in few cases. (C-D) In very few cases do non-white students become numerical racial majorities (i.e., only if white < .5). However, becoming a numerical racial majority is not a given when white < .5, as there are more than two racial groups – i.e., whites (or another group) might still be majorities if the remaining fraction is split into several smaller nonwhite subgroups. Note that only in certain years do non-whites become a numerical majority in engineering.



**Table S1.** *Descriptive statistics of the number of concepts in a dissertation abstract.*

|                                | Mean  | SD    | Median | Minimum | Maximum |
|--------------------------------|-------|-------|--------|---------|---------|
| Overall                        | 56.50 | 19.44 | 57     | 0       | 356     |
| <b>By race</b>                 |       |       |        |         |         |
| URM                            | 57.14 | 19.34 | 57     | 0       | 356     |
| Asian                          | 56.69 | 19.12 | 57     | 0       | 219     |
| White                          | 56.27 | 19.56 | 56     | 0       | 331     |
| <b>By gender</b>               |       |       |        |         |         |
| Women                          | 57.22 | 19.39 | 57     | 0       | 265     |
| Men                            | 56.02 | 19.53 | 56     | 0       | 356     |
| <b>By field</b>                |       |       |        |         |         |
| Biology & Health               | 60.02 | 16.77 | 60     | 0       | 248     |
| Earth Sciences                 | 57.63 | 17.96 | 59     | 0       | 183     |
| Engineering                    | 54.48 | 18.86 | 54     | 0       | 356     |
| Humanities                     | 66.93 | 22.86 | 69     | 0       | 331     |
| Physical Sciences              | 50.16 | 19.38 | 51     | 0       | 219     |
| Social and Behavioral Sciences | 54.43 | 18.03 | 54     | 0       | 265     |

**Table S2.** Sensitivity analyses across *K* and *FREX* scenarios mostly show a similar pattern of results.

We find a qualitatively similar pattern of results across our *K* and *FREX* scenarios and this shows that most of our main results are insensitive to the way we extract concepts – i.e., weighing more to frequency or exclusivity – despite that the quantitative correlations might vary across scenarios. “Yes” in the table below indicates a statistically significant effect (i.e., one-sided *p*-value < .05) Note that we especially find some variable results in the lower *K* (400) or very high exclusivity scenarios. This likely results from our conservative filter to detect spurious links that we describe in the Materials and Methods. We present the “middle” scenario as the main one in the paper (*K*500, *freq*50/*excl*50).

|                                                       | K400, freq25/excl75 | K400, freq50/excl50 | K400, freq75/excl25 | K500, freq25/excl75 | K500, freq50/excl50 | K500, freq75/excl25 | K600, freq25/excl75 | K600, freq50/excl50 | K600, freq75/excl25 |
|-------------------------------------------------------|---------------------|---------------------|---------------------|---------------------|---------------------|---------------------|---------------------|---------------------|---------------------|
| <b>Novelty (# new links)</b>                          |                     |                     |                     |                     |                     |                     |                     |                     |                     |
| % Same-gender ↓ # new links                           | Yes                 |
| % Same-race ↓ # new links                             | No                  | Yes                 |
| Women ↑ # new links                                   | Yes                 |
| Non-white ↑ # new links                               | Yes                 |
| <b>Impactful novelty (uptake per new link)</b>        |                     |                     |                     |                     |                     |                     |                     |                     |                     |
| % Same-gender ↑ uptake per new link                   | No                  | No                  | Yes                 | No                  | Yes                 | Yes                 | Yes                 | Yes                 | Yes                 |
| % Same-race ↑ uptake per new link                     | No                  |
| Women ↓ uptake per new link                           | Yes                 |
| Non-white ↓ uptake per new link                       | No                  | No                  | No                  | Yes                 | Yes                 | Yes                 | Yes                 | Yes                 | No                  |
| <b>Distal novelty</b>                                 |                     |                     |                     |                     |                     |                     |                     |                     |                     |
| % Same-gender ↑ distality                             | Yes                 |
| Distality ↓ uptake per new link                       | Yes                 |
| <b>Novelty’s relation with careers</b>                |                     |                     |                     |                     |                     |                     |                     |                     |                     |
| Novelty ↑ faculty research                            | Yes                 |
| Novelty ↑ continued research                          | Yes                 |
| <b>Impactful novelty’s relation with careers</b>      |                     |                     |                     |                     |                     |                     |                     |                     |                     |
| Novelty ↑ faculty research                            | Yes                 |
| Novelty ↑ continued research                          | Yes                 |
| <b>Novelty discount on careers</b>                    |                     |                     |                     |                     |                     |                     |                     |                     |                     |
| Gender minorities novelty discount for faculty        | No                  | Yes                 | Yes                 | Yes                 | Yes                 | Yes                 | No                  | Yes                 | Yes                 |
| Gender minorities novelty discount for cont. research | No                  | Yes                 | Yes                 | No                  | No                  | Yes                 | No                  | Yes                 | Yes                 |
| Racial minorities novelty discount for faculty        | Yes                 |
| Racial minorities novelty discount for cont. research | Yes                 |
| <b>Impactful novelty discount on careers</b>          |                     |                     |                     |                     |                     |                     |                     |                     |                     |
| Gender minorities impact discount for faculty         | Yes                 |
| Gender minorities impact discount for cont. research  | Yes                 |
| Racial minorities impact discount for faculty         | Yes                 |
| Racial minorities impact discount for cont. research  | No                  |

**Table S3.** *Novelty and impactful novelty correspond with publication productivity and impact. Descriptive analyses (linear regression models) where we regress total number of publications and accumulated citations (both logged) of students' work on novelty and impactful novelty. We use fixed effects for academic discipline, year of PhD graduation, and PhD university. We find that the novelty and impactful novelty positively relate to the number of publications and students' accumulated citations.*

|                                  | <u>log(# Publications)</u> |       |          | <u>log(# Citations)</u>         |       |          | <u>log(# Citations)</u> |       |          |                                        |       |          |
|----------------------------------|----------------------------|-------|----------|---------------------------------|-------|----------|-------------------------|-------|----------|----------------------------------------|-------|----------|
|                                  | Coef.                      | S.E.  | <i>p</i> | Coef.                           | S.E.  | <i>p</i> | Coef.                   | S.E.  | <i>p</i> | Coef.                                  | S.E.  | <i>p</i> |
| <i>log</i> (# New links)         | 0.034                      | 0.001 | 0.000    |                                 |       |          | 0.030                   | 0.002 | 0.000    |                                        |       |          |
| <i>log</i> (Uptake per new link) |                            |       |          | 0.037                           | 0.002 | 0.000    |                         |       |          | 0.054                                  | 0.002 | 0.000    |
| <i>log</i> (# Publications)      |                            |       |          |                                 |       |          | 1.337                   | 0.002 | 0.000    | 1.333                                  | 0.002 | 0.000    |
| Observations                     | 532,077                    |       |          | 425,318                         |       |          | 464,920                 |       |          | 374,415                                |       |          |
| Inclusion criteria               | Publishing                 |       |          | Publishing with nonzero novelty |       |          | Cited publication       |       |          | Cited publication with nonzero novelty |       |          |

**Table S4.** Concepts with their ten nearest, most-proximal neighbors in the embedding space. While there are no predefined or definitive tests for precisely quantifying what concept embeddings capture, we show here that concept embeddings capture semantic distances between concept quite effectively. To do this, we consider a few arbitrary concepts and look at their ten nearest neighbors in the embedding space as shown. By examining the set of nearest neighbors for these set of sample concepts, we note that the nearest neighbors are semantically similar to the focal concept. For instance, note that words which are similar to “syntax” include concepts like “grammar,” “phrase structure,” “semantics,” and “word order” suggesting that concepts close to other concepts in this vector space captured through the embeddings effectively capture two concepts that are highly related substantively.

| Concept   | Ten nearest neighbors in the embedding space |                      |                               |                      |                    |
|-----------|----------------------------------------------|----------------------|-------------------------------|----------------------|--------------------|
| gene      | gene_encod                                   | genes_involv         | pathway_gen                   | gene_clust           | gene_locus         |
|           | genes_were_found                             | genes_loc            | gene_rev                      | gene_set             | regulatory_target  |
| magnet    | magnetic_field                               | local_magnet         | magnetoresent                 | nonmagnet            | ferromagnet        |
|           | high_magnet                                  | external_magnet      | large_magnetic_field          | weak_magnet          | hard_axi           |
| hiv       | hiv_infect                                   | hiv-infect           | human_immunodeficiency_virus  | hcv                  | hiv_transmiss      |
|           | hiv-posit                                    | gbv-c                | haart                         | hiv_posit            | hiv_diseas         |
| fiscal    | fiscal_polici                                | budgetari            | revenues_and_expenditur       | intergovernmental_gr | non-fisc           |
|           | debt_servic                                  | fiscal_stress        | public_spend                  | local_fisc           | state_fisc         |
| christian | evangel                                      | non-christian        | theolog                       | catholic             | christian_faith    |
|           | judaism                                      | nicen                | jewish_peopl                  | american_protest     | montanist          |
| optic     | qoct                                         | wavelength-select    | solid_immers                  | optical_filt         | light_guid         |
|           | coupled_cav                                  | coherent_light       | superlens                     | wavelength-tun       | all-fib            |
| topolog   | binary_hypercub                              | vertex_and_edg       | fat-tre                       | global_topolog       | connection_matrix  |
|           | sw-banyan                                    | rectangular_du       | physical_topolog              | graph_properti       | graph_represent    |
| buddhist  | buddhism                                     | daoist               | non-buddhist                  | taoist               | theravada          |
|           | tantric                                      | pure_land            | buddha                        | chinese_buddhist     | neo-confucian      |
| religion  | religi                                       | traditional_religion | american_civil_religion       | manikkavacakar       | christian          |
|           | sikhism                                      | salaf                | relationship_between_religion | varkari              | islamic_faith      |
| oxygen    | o2                                           | high_oxygen          | molecular_oxygen              | oxid                 | sulfur             |
|           | low_oxygen                                   | carbon_dioxid        | presence_of_oxygen            | amount_of_oxygen     | peroxid            |
| laser     | q-switch                                     | laser_puls           | diode-pump                    | fs_puls              | narrow_linewidth   |
|           | diode_las                                    | pump_sourc           | 1064nm                        | laser_beam           | femtosecond_las    |
| electron  | spin_degree_of_freedom                       | single-electron      | spin_hall_effect              | spin_accumul         | charge_and_spin    |
|           | conduction_electron                          | electron-volt        | photoinject                   | coupled_quantum_wel  | single_quantum_dot |
| proton    | deuteron                                     | methylene_proton     | protonated_and_unproton       | proton_transf        | n-proton           |
|           | d-channel                                    | dominant_react       | dehydron                      | hydrazyl             | halogen_atom       |
| photon    | single_photon                                | polarization-entangl | entangled_photon_pair         | nonlinear_cryst      | photon_pair        |
|           | spontaneous_parametr                         | single-photon        | high harmonic gener           | beamstrahlung        | antibunch          |
| oil       | petroleum                                    | asphaltene_cont      | crude_oil                     | oil_extract          | oil_sand           |
|           | bitumen-deriv                                | linse                | bitumen                       | liquefied_natural_ga | soybean_oil        |
| tomb      | sarcophagi                                   | funerari             | statu                         | monument             | stela              |
|           | palac                                        | shrine               | templ                         | necropoli            | statuett           |
| syntax    | syntact                                      | syntactic_structur   | grammar                       | syntactic_and_semant | phrase_structur    |
|           | grammat                                      | syntactic_analysi    | semant                        | grammatical_categori | word-ord           |

## Supplementary References

1. S.E. Page, *The Diversity Bonus: How Great Teams Payoff in the Knowledge Economy*. (Princeton University Press, Princeton, 2009).
2. S.T., Bell, A.J. Villado, M.A. Lukasik, L. Belau, A.L. Briggs, Getting Specific About Demographic Diversity Variable and Team Performance Relationships: A Meta-Analysis. *Journal of Management* **37**, 709-743 (2011).
3. M.W. Nielsen, et al. Gender Diversity Leads to Better Science. *Proceedings of the National Academy of Sciences of the United States of America* **109**, 1740-1742 (2017).
4. M.W. Nielsen, J.P. Andersen, L. Schiebinger, J.W. Schneider, One and a Half Million Medical Papers Reveal a Link Between Author Gender and Attention to Gender and Sex Analysis. *Nature and Human Behavior* **1**, 791-796 (2017).
5. B. Uzzi, S. Mukherjee, M. Stringer, B. Jones, Atypical Combinations and Scientific Impact. *Science* **342**, 468–472 (2013).
6. D. Jurgens et al, Measuring the Evolution of a Scientific Field through Citation Frames. *Transactions of the Association for Computational Linguistics* **6**, 391-406 (2018).
7. J.G. Foster, A. Rzhetsky, J.A. Evans, Tradition and Innovation in Scientists' Research Strategies. *American Sociological Review* **80**, 875-908 (2015).
8. E. Leahey, J. Moody, Sociological Innovation through Subfield Integration. *Social Currents* **1**, 228-256 (2014).
9. I. Gil-Leiva, A. Alonso-Arroyo, Keywords Given by Authors of Scientific Articles in Database Descriptors. *Journal of the American Society for Information Science and Technology* **58**, 1175-1187 (2007).

10. H. Small, On the shoulders of Robert Merton: Towards a normative theory of citation. *Scientometrics* **60**, 71-79 (2004).
11. M.E. Roberts et al, Structural Topic Models for Open-Ended Survey Responses. *American Journal of Political Science* **58**, 1064-1082 (2014).
12. M.E., Roberts, B.M. Stewards, E.M. Airoidi, A Model of Text for Experimentation in the Social Sciences. *Journal of the American Statistical Association* **111**, 988-1003 (2016).
13. D.M. Blei, A.Y. Ng, M.I. Jordan, Latent Dirichlet Allocation. *Journal of Machine Learning Research* **3**, 993-1022 (2003).
14. J. Grimmer. An Introduction to Bayesian Inference Via Variational Approximations. *Political Analysis* **19**, 32-47 (2011).
15. A. El-Kishky et al, Scalable Topical Phrase Mining from Text Corpora. *Proceedings of the VLDB Endowment* **8** (2014).
16. D. Mimno, H.M.Wallach, E. Talley, M. Leenders, & A. McCallum, Optimizing Semantic Coherence in Topic Models. *Proceedings of the Conference on Empirical Methods in Natural Language Processing*, 262-272 (2011).
17. J. Wu, H. Xiong, & J. Chen, Adapting the Right Measures for K-means Clustering. *Proceedings of the 15th ACM SIGKDD International Conference on Knowledge Discovery and Data Mining*, 877-886 (2009).
18. E.H. Ramirez, R. Brena, D. Magatti, F. Stella, Topic Model Validation. *Neurocomputing* **76**, 125-133 (2012).
19. J.M. Bischof, E.M. Airoidi, Summarizing Topical Content With Word Frequency and Exclusivity. *Proceedings of the International Conference on Machine Learning* (2012).

20. C. Orasan, "Patterns in Scientific Abstracts" in Proceedings of Corpus Linguistics 2001 Conference, P. Rayson, A. Wilson, T. McEnery, A. Hardie, S. Khoja, Eds (Lancaster, 2001), pp. 433–443.
21. H. Yu, M. Lee, Accessing Bioscience Images from Abstract Sentences. *Bioinformatics* **22**, e547-e556 (2006).
22. P.K. Shah, C. Perez-Iratxeta, P. Bork, M.A Andrade, Information Extraction from Full Text Scientific Articles: Where are the Keywords? *BMC Bioinformatics* **4**, 1-9 (2003).
23. M.J. Schuemie, M, et al, Distribution of Information in Biomedical Abstracts and Full-Text Publications. *Bioinformatics* **20**, 2597-2604 (2004).
24. S. Syed, M. Spruit, Full-text or Abstract? Examining topic Coherence Scores Using Latent Dirichlet Allocation. *2017 IEEE International conference on data science and advanced analytics*, 165-174 (2017).
25. C. Ramisch, P. Schreiner, M. Idiart, A. Villavicencio, An evaluation of Methods for the Extraction of Multiword Expressions. Proceedings of the LREC Workshop Towards a Shared Task for Multiword Expressions 2008, 50-53 (2008).
26. ProQuest. ProQuest Dissertations & Theses Global. Available at [proquest.com/products-services/pqdtglobal.html](http://proquest.com/products-services/pqdtglobal.html)
27. Hofstra, B., Corten. R., Van Tubergen, F., & Ellison, N. C. Sources of Segregation in Social Networks: A Novel Approach Using Facebook. *American Sociological Review* **82**, 625-656 (2017).
28. US Census Bureau, Frequently Occurring Surnames from the Census. US Census Bureau. Available at [census.gov/topics/population/genealogy/data/2000\\_surnames.html](http://census.gov/topics/population/genealogy/data/2000_surnames.html). Deposited 15 September 2014.

29. Social Security Administration, Popular Baby Names. SSA. Available at [ssa.gov/oact/babynames/limits.html](http://ssa.gov/oact/babynames/limits.html). Deposited 5 April 2019.
30. C. W. Fox, C.S. Burns, A.D. Muncy, J.A. Meyer, Gender Differences in Patterns of Authorship Do Not Affect Peer Review Outcomes at an Ecology Journal. *Functional Ecology* **30**, 126-139 (2015).
31. C.M. Topaz, S. Sen, Gender Representation on Journal Editorial Board in the Mathematical Sciences. *PLoS ONE* **11**, e0161357 (2016).
32. L. Holman, D. Stuart-Fox, C.E. Hauser, The gender Gap in Science: How Long Until women Are Equally Represented? *PLoS Biology* **16**, e2004956 (2018) .
33. G. Sood, S. Laohaprapanon, Predicting Race and Ethnicity From the Sequence of Characters in a Name. *arXiv preprint*, arXiv:1805.02109 (2018).
34. G. Sood, Florida Voter Registration Data. Harvard Dataverse. Available at [dataverse.harvard.edu/dataset.xhtml?persistentId=doi:10.7910/DVN/UBIG3F](http://dataverse.harvard.edu/dataset.xhtml?persistentId=doi:10.7910/DVN/UBIG3F). Deposited 7 February 2017.
35. C.A. Cameron, P.K. Trivedi, *Microeconomics Using Stata*. 553-598 (Stata Press, 2010).
36. A. Agresti. *An Introduction to Categorical Data Analysis*. 74-84 (Wiley, 2007).
37. M. Levin, S. Krawczyk, S. Bethard, D. Jurafsky, Citation-Based Bootstrapping for Large-Scale Author Disambiguation. *Journal of the American Society for Information Science and Technology* **63**, 1030-1047 (2012).
